# Supplementary material
Source: ML conference proceedings conference paper supplement (https://openreview.net/forum?id=lrmWjWqUJn)

cEBNMF

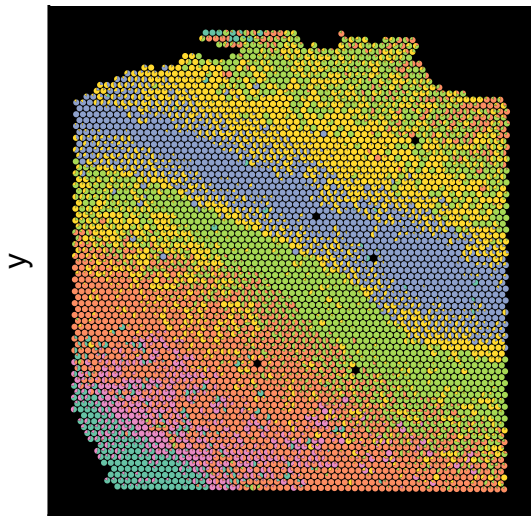

x

type

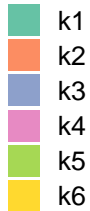

EBNMF

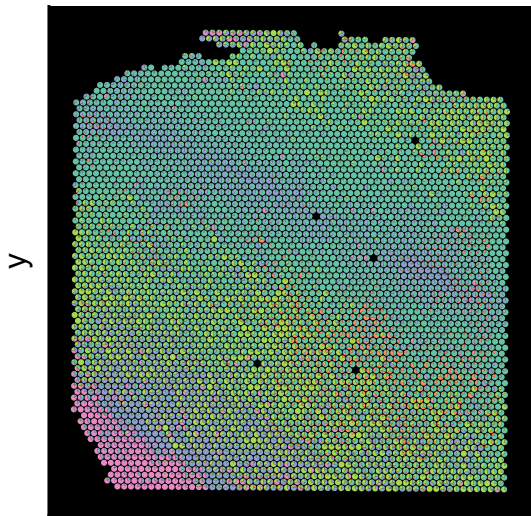

x

type

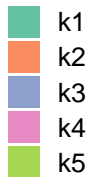

Supplement: supplementary_material [file attachment]

cEBNMF

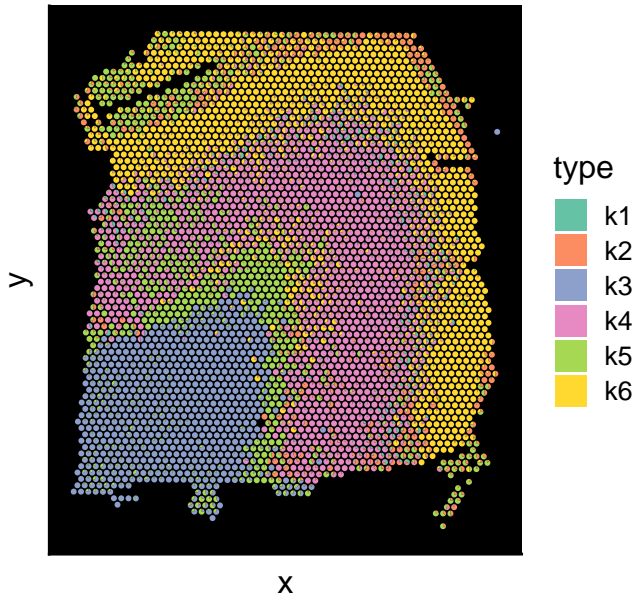

EBNMF

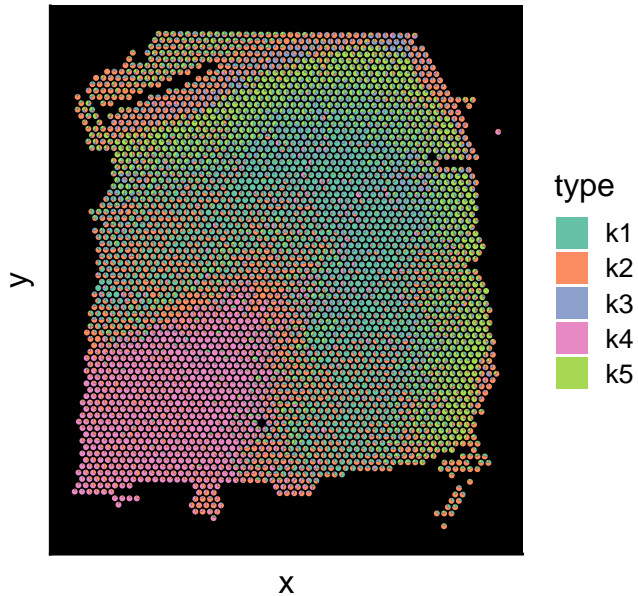

Supplement: supplementary_material [file attachment]
